# Supplementary material for: Insight into the anti-aging mechanisms of natural phenolic antioxidants in natural rubber composites using a screening strategy based on molecular simulation
Source: Royal Society of Chemistry journal article supplement (doi:10.1039/d0ra03425h), 2020-01-01
Supplement: d0ra03425h1.pdf [file d0ra03425h1.pdf]

## Supporting Information

Table S1. Molecular structure of 18 natural phenolic antioxidants and the free energies of dissociation of ArO-H bonds at different positions.

| Number | Molecular Structure and the corresponding position                                                                                           | Dissociation positions | $\Delta G^{298K}$ (kJ/mol)                     |
|--------|----------------------------------------------------------------------------------------------------------------------------------------------|------------------------|------------------------------------------------|
| 1      | 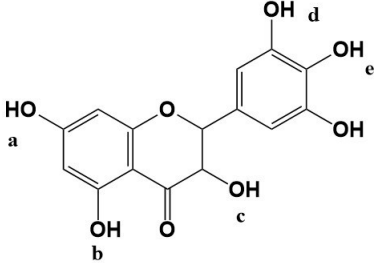 <p style="text-align: center;"><b>Dihydromyricetin</b></p> | a<br>b<br>c<br>d<br>e  | 362.01<br>404.86<br>413.34<br>355.00<br>315.15 |
| 2      |  <p style="text-align: center;"><b>Quercetin</b></p>       | a<br>b<br>c<br>d<br>e  | 353.46<br>315.37<br>410.77<br>407.54<br>366.16 |
| 3      |  <p style="text-align: center;"><b>Silymarin</b></p>      | a<br>b<br>c<br>d<br>e  | 367.55<br>387.77<br>407.15<br>348.61<br>421.55 |
| 4      |  <p style="text-align: center;"><b>Curcumin</b></p>       | a<br>b<br>c            | 328.46<br>328.77<br>404.00                     |

|                                       |  |        |                  |
|---------------------------------------|--|--------|------------------|
| 5                                     |  | a<br>b | 325.38<br>357.35 |
| <b>Demethoxycurcumin</b>              |  |        |                  |
| 6                                     |  | a*2    | 360.37           |
| <b>Bilemethoxycurcumin</b>            |  |        |                  |
| 7                                     |  | a      | 304.48           |
| <b><math>\alpha</math>-tocopherol</b> |  |        |                  |
| 8                                     |  | a      | 312.73           |
| <b><math>\beta</math>-tocopherol</b>  |  |        |                  |
| 9                                     |  | a      | 315.12           |
| <b><math>\gamma</math>-tocopherol</b> |  |        |                  |
| 10                                    |  | a      | 329.74           |
| <b><math>\delta</math>-tocopherol</b> |  |        |                  |

|    |                                                                                                                                                  |                                 |                                                                    |
|----|--------------------------------------------------------------------------------------------------------------------------------------------------|---------------------------------|--------------------------------------------------------------------|
| 11 | 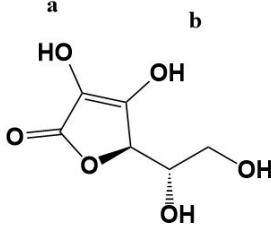 <p style="text-align: center;"><b>vitamin C</b></p>            | a<br>b                          | 328.54<br>322.46                                                   |
| 12 |  <p style="text-align: center;"><b>Resveratrol</b></p>          | a<br>b<br>c                     | 327.08<br>349.94<br>350.30                                         |
| 13 |  <p style="text-align: center;"><b>Rosmarinic acid</b></p>     | a<br>b<br>c<br>d<br>e           | 295.67<br>301.95<br>331.56<br>342.67<br>402.06                     |
| 14 |  <p style="text-align: center;"><b>lipid-soluble EGCG</b></p> | a<br>b<br>c<br>d<br>e<br>f<br>g | 353.78<br>327.34<br>329.69<br>321.54<br>304.29<br>261.51<br>329.86 |
| 15 |  <p style="text-align: center;"><b>Astaxanthin</b></p>       | a*2<br>b*2<br>c*2<br>d*2        | 384.00<br>307.16<br>341.24<br>362.73                               |
| 16 |  <p style="text-align: center;"><b>Lawsone</b></p>            | a                               | 355.32                                                             |

|    |                                                                                                |   |        |
|----|------------------------------------------------------------------------------------------------|---|--------|
| 17 | 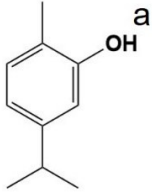<br>Carvacrol | a | 342.00 |
| 18 | <br>Thymol    | a | 335.59 |

Table S2. Free energy of dissociation for hydrogen in NR.

| Dissociation position <sup>1</sup> | a      | b      | c      | d      |
|------------------------------------|--------|--------|--------|--------|
| $\Delta G^{298.15K}$ (kJ/mol)      | 347.42 | 437.21 | 357.91 | 354.29 |

<sup>1</sup>the structure of NR at different dissociation position was seen in Fig. S1.

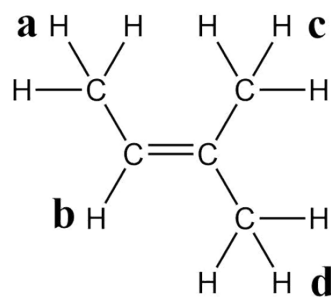

Figure S1. The dissociation positions of NR.

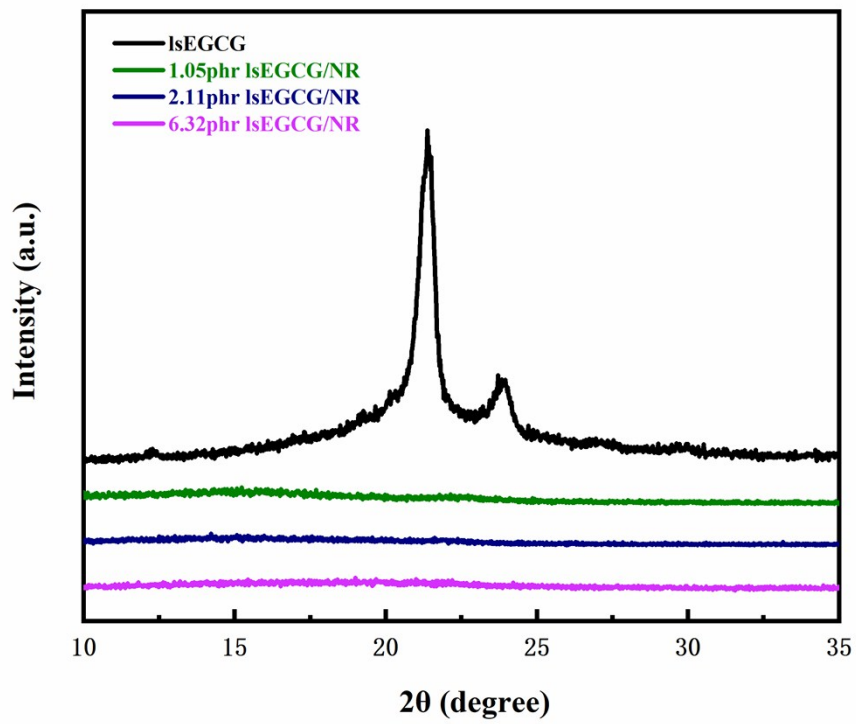

Figure S2. X-ray diffraction patterns of lsEGCG powder and lsEGCG/NR compounds with different contents.
